# Supplementary material
Source: PubMed Central journal article supplement (PMC2615511)

of the boxes are meant to represent the approximate degree of resulting impairment. For example, deletion of the filamin binding domain resulted in the loss of all functions except growth promotion, which was only partially affected.

## SUPPLEMENTARY MATERIALS

**Table S1:** Sequence of PCR Primers used to quantify mRNAs encoding vWFR subunits in human cells. Location refers to the 5'-end of the primer in the cDNA's according to the GenBank numbering system.

| Name of Primer and location<br>Length (bp)            | Sequence (5'→3')              | Product |
|-------------------------------------------------------|-------------------------------|---------|
| GpIb $\alpha$ (FWD)<br>781 (GenBank No.<br>NM_000173) | CTG CAG GAC AAT GCT GAA<br>AA | 200     |
| GpIb $\alpha$ (REV)<br>981                            | GCC CTC AGT GTC CTC TTC<br>TG |         |
| GpIb $\beta$ (FWD)<br>702 (NM_000407)                 | CCT GCA AAC TCG ACA GGA<br>C  | 230     |
| GpIb $\beta$ (REV)<br>932                             | CAG AGT TTG GAA GGG AGA<br>CG |         |
| GpV (FWD)<br>1749 (L11238)                            | TGG GTA AAC CAA TGG GAA<br>AA | 197     |
| GpV (REV)<br>1946                                     | GGC CTG TGA GAA TGA AGA<br>GC |         |
| GpIX (FWD)<br>151 (NM_000174)                         | AGA AGG CTG AGA CCC GAG<br>A  | 234     |
| GpIX (REV)<br>385                                     | ACG GAC TGA AGG CTG TTG<br>TT |         |

**Table S2:** Sequences of GpIb $\alpha$  mutagenic primers used for generation of internal deletions. Only the sequences of the "top" oligonucleotides are shown.

| Name<br>(5'→3')       | Sequence of mutagenic oligonucleotide (top only)               |
|-----------------------|----------------------------------------------------------------|
| Del. Sig.             | CAG TGG TCG AGC ATG CCT * CAC CCC ATC TGT GAG GTC              |
| Del. (25-75)          | ATC TGT GAG GTC TCC AAA * CTG AAC CTA GAT AGG TGC              |
| Del. LRR/vWF (75-210) | TAC ACT CGC CTC ACT CAG * CAC CTC CTG CCT TTT GCT              |
| Del. Thromb.(271-319) | GAC AAT TCA GAC AAG TTT * ACC CCC TGG GGT CTA TTC              |
| Del.Polym. (405-442)  | ATG ACC ACC CTG GAG CCC * ACA AGC CTG ATC ACT CCA              |
| Del. (620-626)        | AGC ACA GTG AGC ATT AGG*GTC GAC ACC ATG GCA GAG                |
| Del. (592-627)        | TGG GTA CGG CCT AAT GGC*GTC GAC ACC ATG GCA GAG                |
| Del. (567-627)        | CAA GTG ACA GTG CCC CGG * GTC GAC ACC ATG GCAGAG               |
| Del Fil. (540-590)    | CCA CAG GCC CTG GAC TCT * GGC CGT GTG GGG CCT CTA              |
| C384/385S**           | TTT CTC CAC CCC GAC TTT <u>TCC TCC</u> CTC CTC CCC CTG GGC TTC |

\*indicates the point corresponding to the deleted sequence.

\*\*Cys384/385 (TGT) were mutated to Ser (TCC, underlined).

Table S3: **Function(s) of deleted/mutated regions of GpIb $\alpha$**

| <b>Deletion/Mutant Name</b> | <b>Amino Acids Affected</b> | <b>Function(s) of Deleted Region</b>                                                           |
|-----------------------------|-----------------------------|------------------------------------------------------------------------------------------------|
| Del. Sig.                   | 3-16                        | Signal peptide; membrane/ER localization                                                       |
| Del. (25-75)                | 25-75                       | O-linked glycos. site; contributes to vWF binding                                              |
| Del. (LRR/vWF)              | 75-210                      | Leu-rich domain; vWF binding                                                                   |
| Del. Thromb.                | 271-319                     | Thrombin binding                                                                               |
| Del. Polym.                 | 405-442                     | 13 amino acid domain repeated up to four times/?function                                       |
| Del. (620-627)              | 620-627                     | 14-3-3- $\zeta$ binding; signaling; regulation of megakaryocyte ploidy                         |
| Del. (592-627)              | 592-627                     | 14-3-3- $\zeta$ binding and phosphorylation site                                               |
| Del. (567-627)              | 567-627                     | 14-3-3- $\zeta$ binding, phosphorylation site, and partial overlap with filamin binding domain |
| Del. Fil.                   | 540-590                     | Filamin binding; actin cytoskeleton interaction                                                |
| C484/485S                   | C484 & C485                 | Disulfide binding with GpIb $\beta$ ; membrane stabilization                                   |

For additional information see <http://ca.expasy.org/uniprot/PO7359>.

### SUPPLEMENTARY FIGURE LEGENDS

**Fig. S1. Subcellular localization of GpIb $\alpha$ .** A. Rat1a1-GpIb $\alpha$  cells and Rat1a-vector cells were fixed in 4% paraformaldehyde-PBS and immunostained with the 9E10 mAb directed against the c-Myc epitope of GpIb $\alpha$ . Secondary staining was with Alexa Fluor 594-conjugated goat anti-mouse IgG as described in Experimental Procedures. B. Staining of HeLa cells as in A except that the anti-GpIb $\alpha$  mAb WM23 was used. C. Staining of HeLa cells as in A except that the LJ-Ib $\alpha$ 1 mAb was used. In B and C, the secondary antibody was Alexa Fluor 610-conjugated goat anti-mouse IgG.

**Fig. S2. Ectopically expressed GpIb $\alpha$  fails to co-localize with the TGF $\beta$ 2 receptor at**

**the cell surface.** Rat1a cells expressing each of the indicated myc epitope-tagged GpIb $\alpha$  mutants were fixed and stained with a mouse anti-GpIb $\alpha$  mAb (LJ-Ib $\alpha$ 1) obtained from Dr. Zaverio Ruggieri. Secondary staining was with Alexa-Fluor610-labeled goat anti mouse IgG. Cells were then stained with a rabbit mAb against the cell surface TGF $\beta$ 2 receptor followed by secondary staining with AlexaFluo488 goat anti rabbit Ig. Confocal microscopy was then performed as previously described (26). Typical fields are shown and depict a striking lack of co-localization of GpIb $\alpha$  (red) and TGF $\beta$ 2 receptor (green) at the cell surface

**Fig. S3. PI profiles of colcemid-treated Rat1a cell lines.** Cell lines expressing each of the mutants depicted in Fig. 2 were treated with colcemid (25 ng/ml, Sigma-Aldrich, St. Louis, MO) for 16 hr and then stained with PI. Cell cycle analyses were performed on propidium iodide-stained nuclei using a FACSstar flow cytometer (Becton-Dickinson Biosciences, San Jose, CA). Data were analyzed by single histogram statistics as previously described (13,14) and were gathered from at least three experiments similar to those depicted here.

**Fig. S4. Composite images of typical nuclei following exposure of Rat1a cells with DCB.** Control cells or those expressing the indicated mutants were grown in the presence of 2  $\mu$ M DCB for 24 hr, fixed in 4% paraformaldehyde/PBS, and stained with DAPI. Note the presence of 2 nuclei of equal size and shape in virtually all Rat1a-vector (control) cells. In contrast, note the large number of cells with >2 nuclei, as well as size and shape discrepancies and other dysmorphic features in Rat1a-GpIb $\alpha$  cells. See Fig. 5B for quantification of at least 200 cells expressing each of the mutants.

**Fig. S5.  $\gamma$ -H2AX foci in Rat1a cells.** Cells from the indicated groups were plated onto glass coverslips and allowed to attain log-phase growth (1-2 d) before fixing in 4% paraformaldehyde-PBS. Coverslips were then stained with an antibody specific for Ser139 of histone H2A ( $\gamma$ -H2AX) (17). Note the absence of any significant staining of Rat1a-vector cells in contrast to the large percentage of such cells in the Rat1a-GpIb $\alpha$  group. Although significant differences in the percentage of positive cells was seen among the various Rat1a groups, the appearances of the  $\gamma$ -H2AX foci among the positive cells in these groups were indistinguishable. See Fig. 5C for quantification of at least 200 cells expressing each of the mutants.

**A**

**Gplba/DAPI**

**Rat1a-vector**

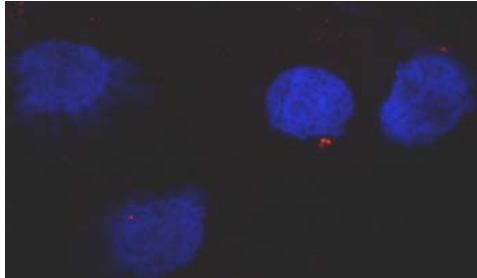

**Rat1a-Gplba**

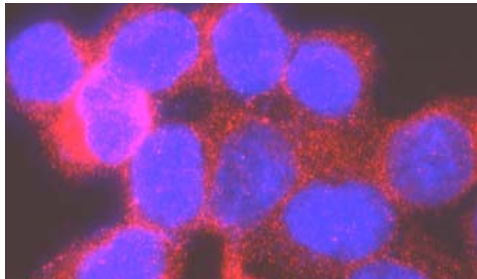

**B**

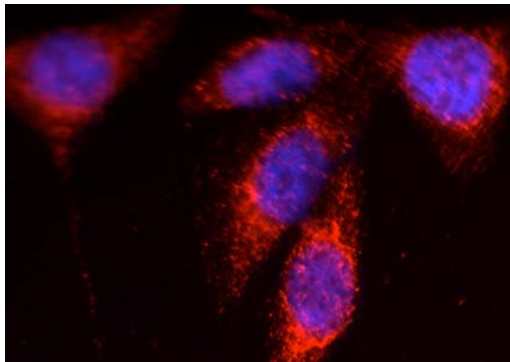

**WM23**

**C**

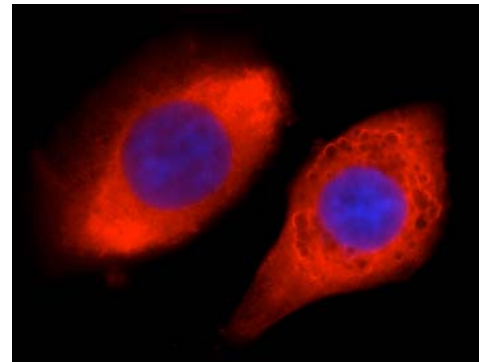

**LJ-Iba1**

**GpIba/TGF- $\beta$ -R2**

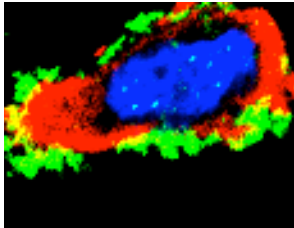

**GpIba**

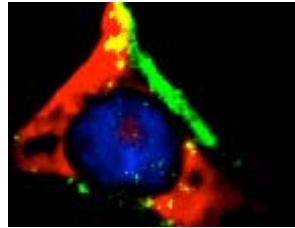

**Del Sig**

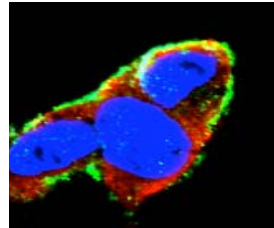

**Del 25-75**

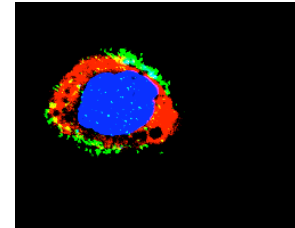

**Del LRR/v WF**

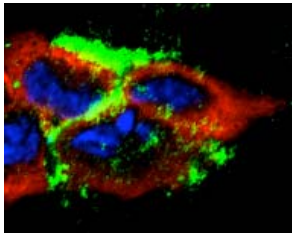

**Del Thromb**

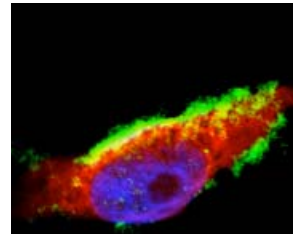

**Del polym**

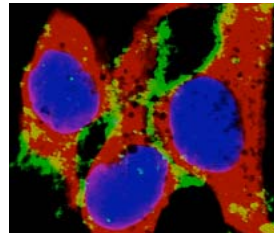

**Del 620-626**

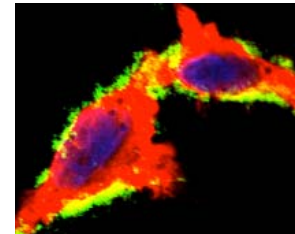

**Del 592-626**

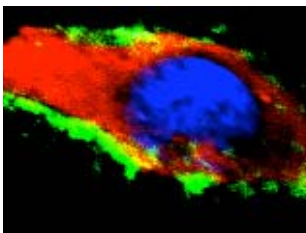

**Del 567-626**

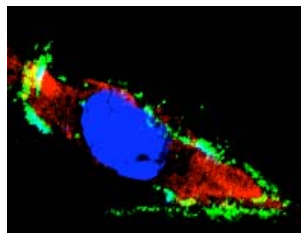

**Del Sig/ 567-626**

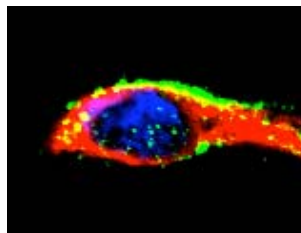

**Del Fil (540-590)**

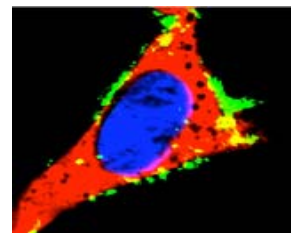

**C484/485S**

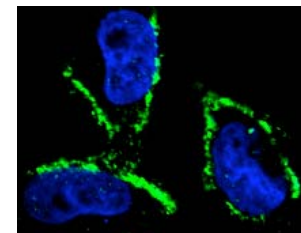

**vector**

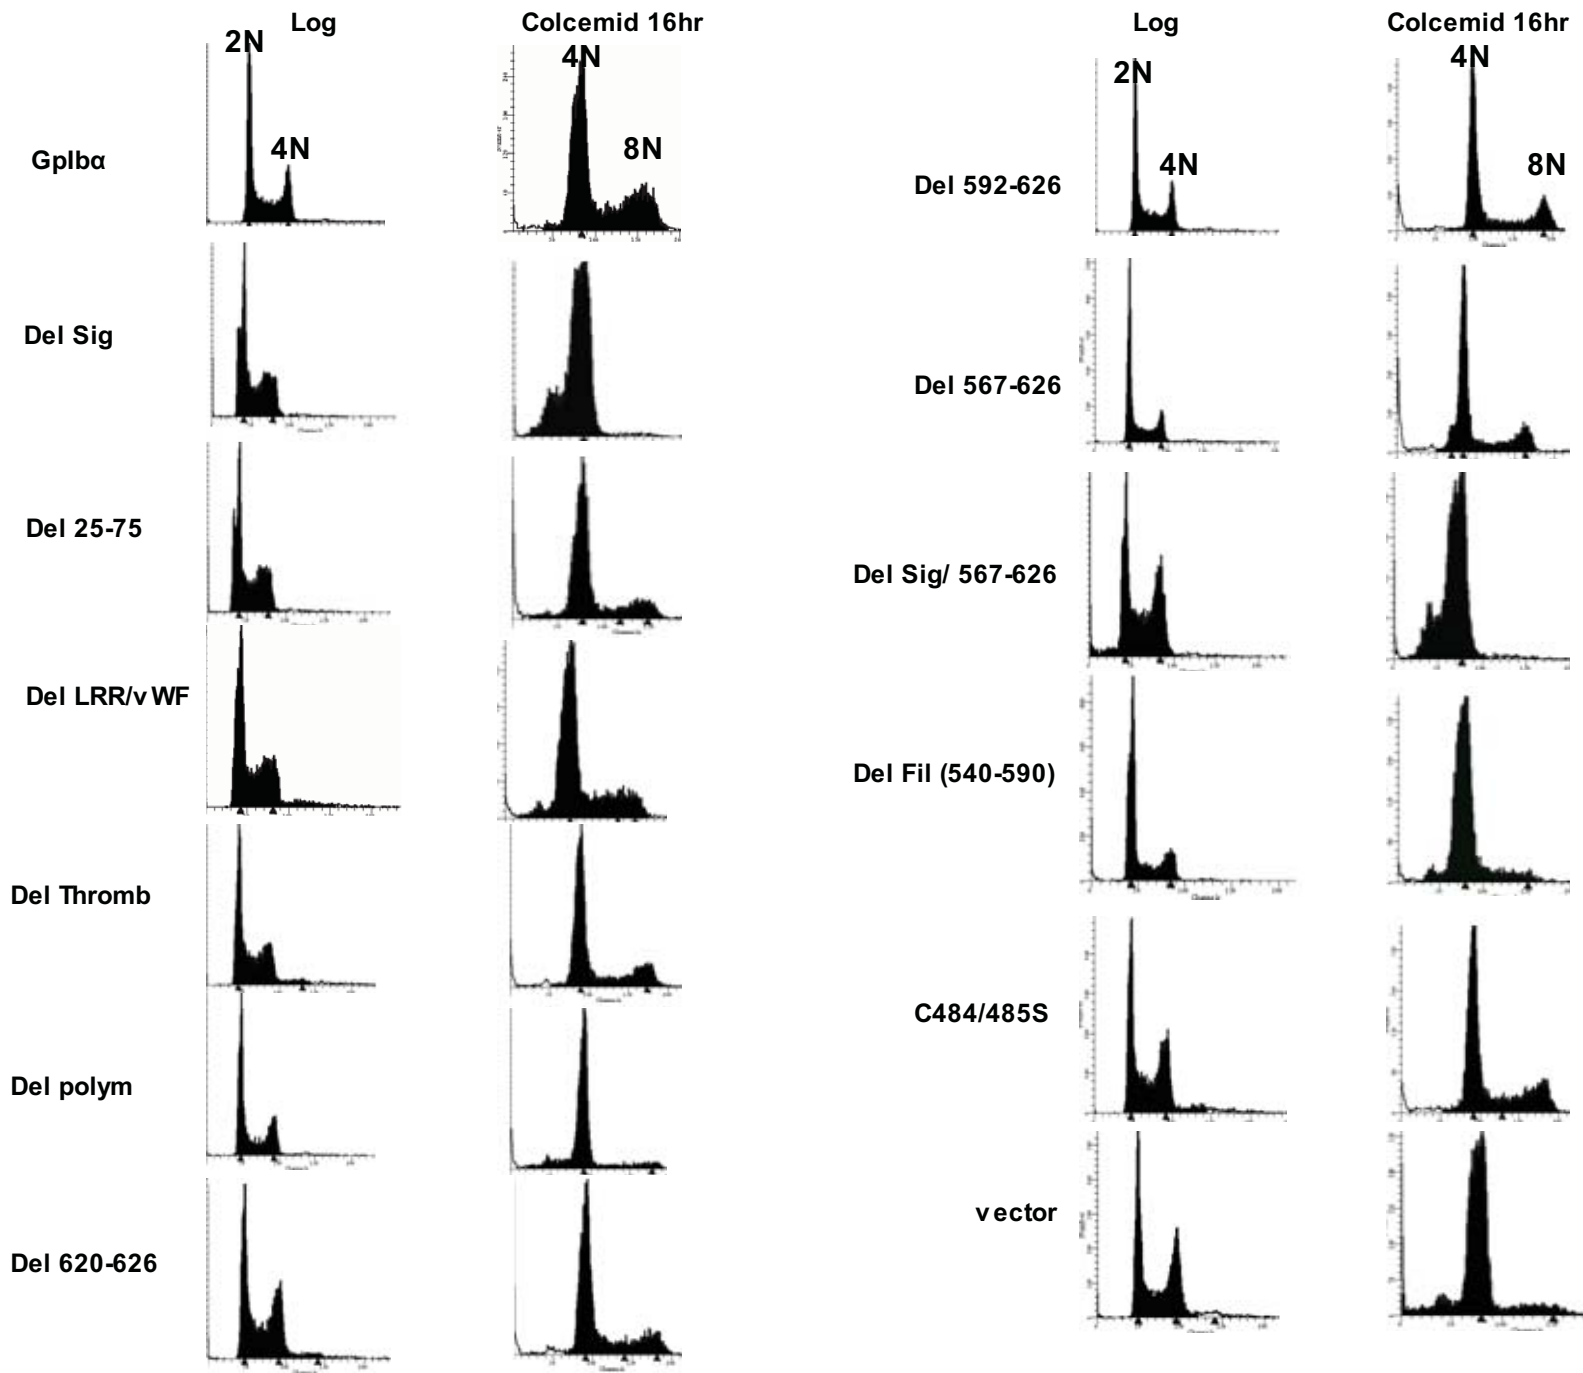

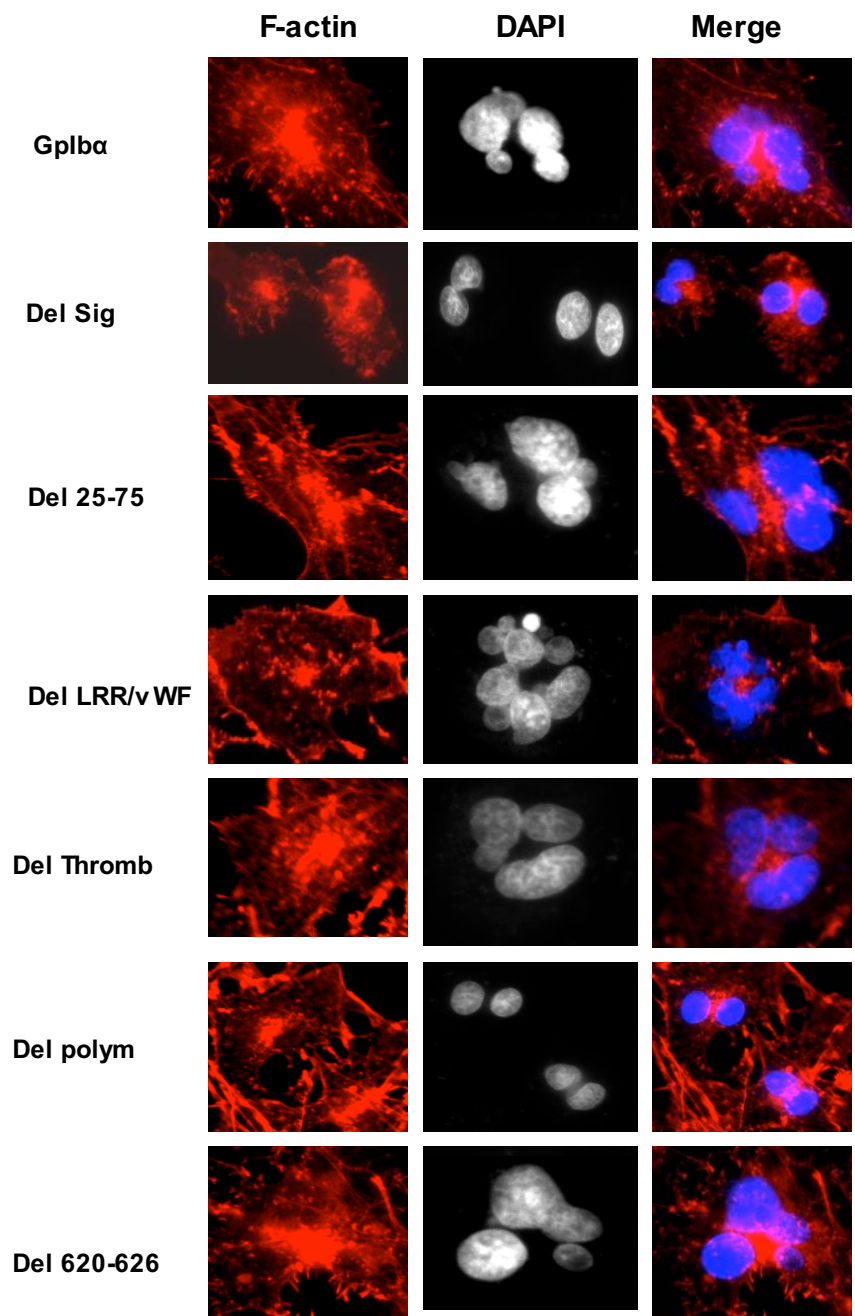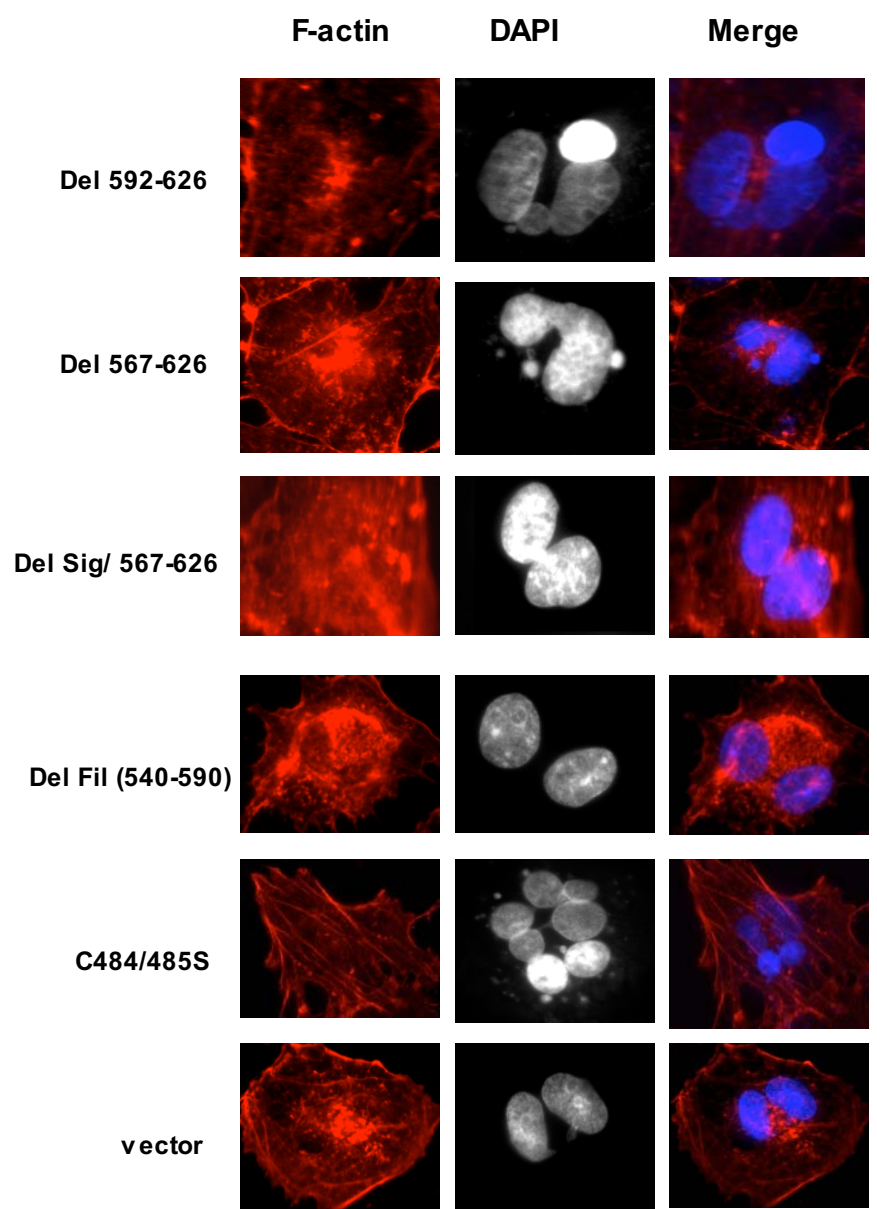

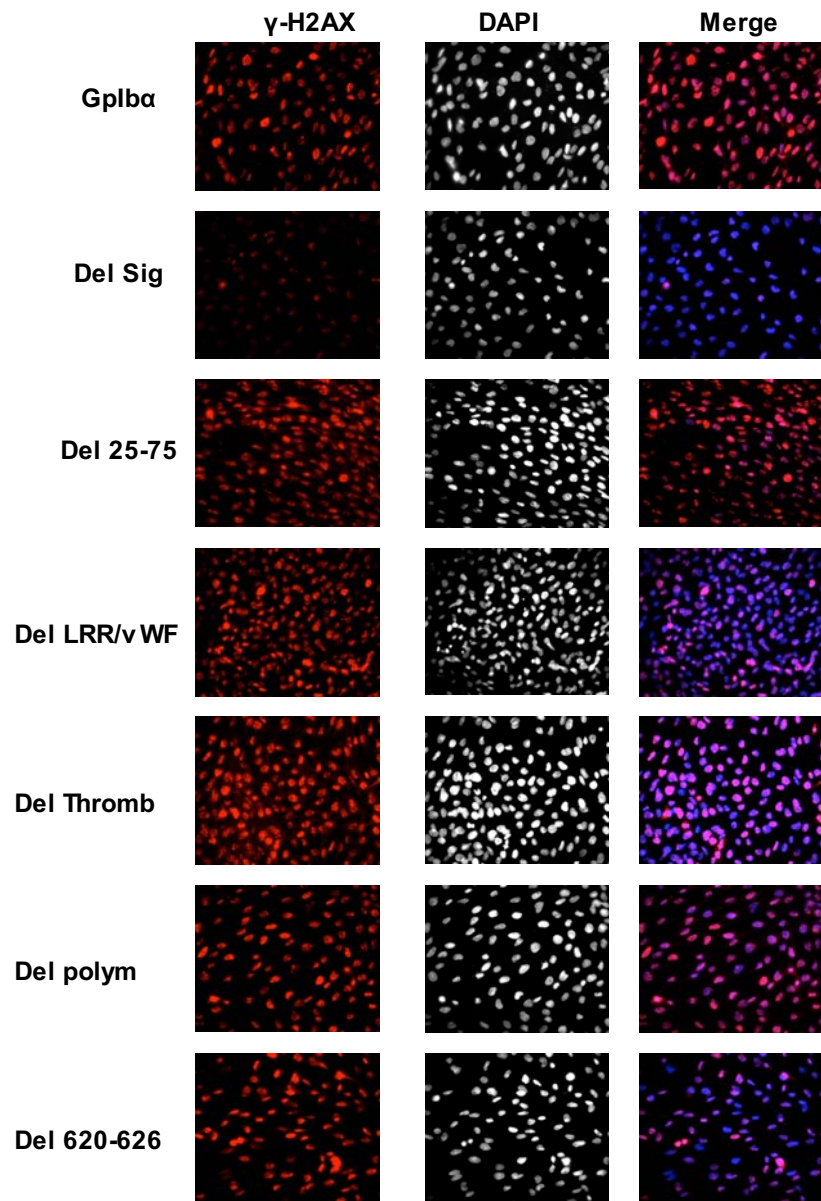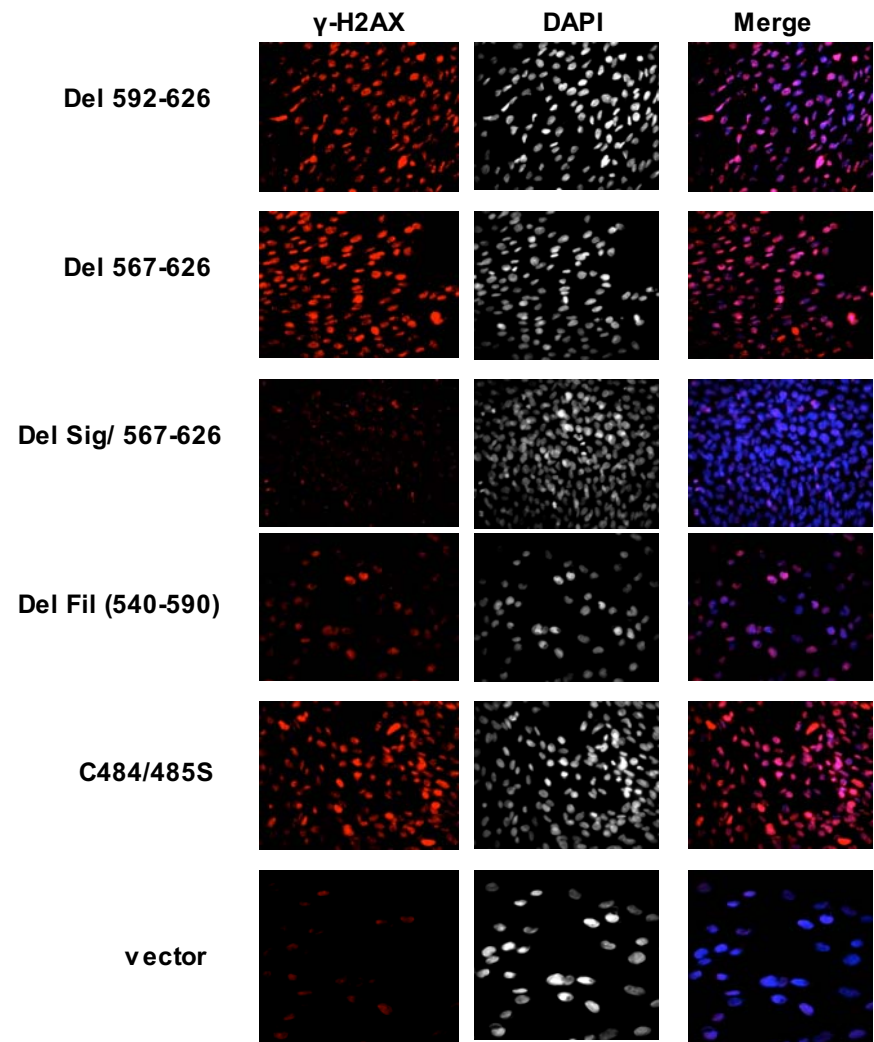

Supplement: M806222200_1.pdf [file M806222200_1.pdf]
